# Supplementary material for: Dual crosslinking hydrogels with tunable injectability and stability for bone repair
Source: Royal Society of Chemistry journal article supplement (doi:10.1039/d2tb00545j), 2022-01-01
Supplement: d2tb00545j1.pdf [file d2tb00545j1.pdf]

Supporting Information

Dual Crosslinking Hydrogels with Tunable Injectability and Stability for Bone Repair

Wenlin Chu<sup>a</sup>, Xiang Ke<sup>a</sup>, Zhiyun Dong<sup>a</sup>, Jing Xie<sup>a</sup>, Jun Luo<sup>\*a</sup> and Jianshu Li<sup>\*a, b, c</sup>

<sup>a</sup>. College of Polymer Science and Engineering, State Key Laboratory of Polymer Materials Engineering, Sichuan University, Chengdu 610065, China.

<sup>b</sup>. State Key Laboratory of Oral Diseases, West China Hospital of Stomatology, Sichuan University, Chengdu, 610041, China.

<sup>c</sup>. Med-X Center for Materials, Sichuan University, Chengdu, 610041, China.

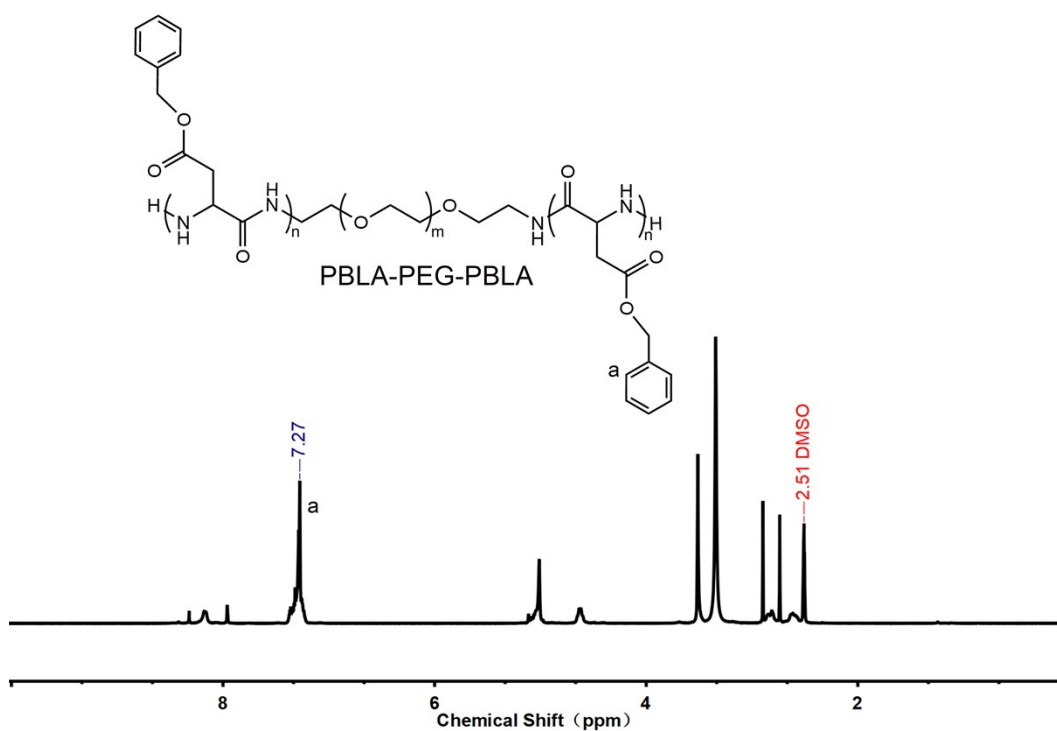

**Fig. S1** <sup>1</sup>H NMR spectra of PBLA-PEG-PBLA in DMSO-d<sub>6</sub>.

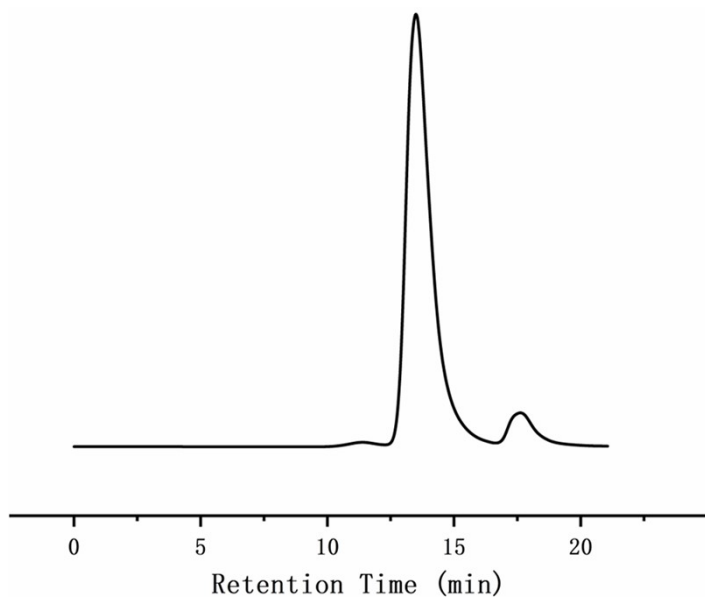

| $M_n$ | $M_w$ | Polydispersity Index |
|-------|-------|----------------------|
| 5832  | 10089 | 1.73                 |

**Fig. S2** GPC trace of PAsp-PEG-PAsp ( $M_n=5832$ , PDI: 1.73).

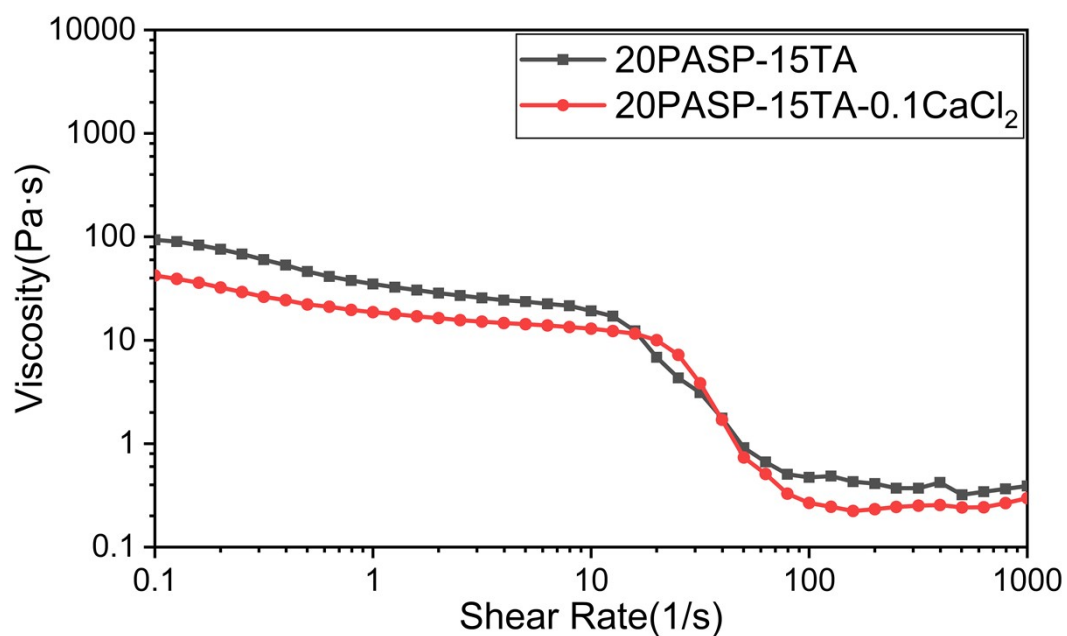

**Fig. S3** Viscosity measuring of the 20 wt% PTA hydrogels with and without immersing in the 0.1M  $\text{CaCl}_2$  solution.

**Table S1** The Results of ICP-OES measuring the mass fraction of Ca<sup>2+</sup> in hydrogels.

| Sample | Quality (mg) | Volume (mL) | Coefficient of dilution | Instrument reading (mg/L) | Mass fraction | Mean mass fraction |
|--------|--------------|-------------|-------------------------|---------------------------|---------------|--------------------|
| 1      | 32.6         | 10          | 50                      | 0.8041                    | 1.2333%       | 1.4252%            |
| 2      | 25.9         | 10          | 50                      | 0.7873                    | 1.5199%       |                    |
| 3      | 29.1         | 10          | 50                      | 0.8860                    | 1.5223%       |                    |

Introduction: The final content of Ca elements, mass fraction= Instrument reading\* Coefficient of dilution\* Volume/ Quality.
